# Supplementary material
Source: PubMed Central journal article supplement (PMC3221538)

## Supplementary Material

### S-Figure 1

A) Western blot analysis of Tbx1 protein in hippocampal tissue with (peptide+) or without (peptide-) pre-adsorption with the antigen. B) Hippocampal Tbx1 in wild-type (WT) and heterozygous (HT) mice. C-D) Tbx1 immunofluorescence without (C) or with (D) pre-adsorption with the antigen in the granular layer of the dentate gyrus.

# S-Figure 1

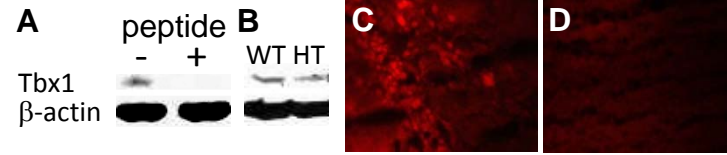

Supplement: supp_ddr404_ddr404supp.pdf [file supp_ddr404_ddr404supp.pdf]
